# Supplementary material for: Water-promoted selective photocatalytic methane oxidation for methanol production
Source: Royal Society of Chemistry journal article supplement (doi:10.1039/d3sc02567e), 2023-12-15
Supplement: d3sc02567e1.pdf [file d3sc02567e1.pdf]

1 **Supporting Information**

2 **Water-promoted selective photocatalytic methane oxidation for methanol**  
3 **production**

4 *Peng Zhou,<sup>†</sup> Songtao Tang,<sup>†</sup> Zhengwei Ye,<sup>†</sup> Ishtiaque Ahmed Navid,<sup>†</sup> Yixin Xiao,<sup>†</sup> Kai Sun<sup>‡</sup> & Zetian Mi<sup>†\*</sup>*

5 <sup>†</sup>Department of Electrical Engineering and Computer Science, University of Michigan, Ann Arbor, MI 48109

6 <sup>‡</sup>Department of Materials Science and Engineering, University of Michigan, 2300 Hayward Street, Ann Arbor,  
7 Michigan 48109, United States

8

9

10

11

12

## 13 **Methods**

14 **Synthesis of *p*-type InGaN nanowires.** *p*-type InGaN nanowires were grown on a 3-inch silicon wafer by  
15 PAMBE technology.<sup>1, 2</sup> Silicon wafer was first cleaned with acetone and 10% buffered hydrofluoric acid.  
16 Then the residual oxide on silicon wafer was removed by an in-situ annealing at ~787 °C in the reaction  
17 chamber before growth. The InGaN NWs were spontaneously grown on silicon wafer under nitrogen-rich  
18 conditions. Ga, In and Mg fluxes were controlled by using thermal effusion cells, while nitrogen radicals were  
19 produced from a radio-frequency nitrogen plasma source. Multi-stack InGaN/GaN layers were grown on a  
20 GaN layer and finally terminated by a GaN capping layer. A nitrogen flow rate of 1.0 sccm and a forward  
21 plasma power of ~350 W were used in the growth process.

22 **Cocatalyst loading.** AgNPs were loaded on InGaN nanowires by a typical photoreduction process. In a  
23 detailed process, a 0.8 cm × 0.8 cm photocatalyst wafer was stabilized on a Teflon holder which was put on  
24 the bottom of one 390 mL Pyrex chamber containing 50 mL of 20vol% methanol aqueous solution. Then 10  
25 μL of 0.2 mol L<sup>-1</sup> AgNO<sub>3</sub> (Sigma-Aldrich) was added into the chamber. The chamber equipped with a vacuum-  
26 tight quartz lid and a vacuum-tight plastic ring was evacuated before photoreduction. After that, the chamber  
27 was irradiated for 20 mins under a 300 W Xe lamp (Cermax, PE300BUV). Finally, the photocatalyst wafer  
28 was washed by deionized water and dried at 150 °C in argon atmosphere before photocatalytic methane  
29 oxidation.

30 **Characterization.** The X-ray diffraction (XRD) pattern of photocatalyst wafer was obtained on a Rigaku X-  
31 ray diffractometer equipped with Cu K $\alpha$  radiation working at the accelerating voltage of 40 kV, the current of  
32 80 mA and the scanning rate of 0.05° 2 $\theta$  s<sup>-1</sup>. The microcosmic morphology of samples was examined by a  
33 Hitachi SU8000 field emission scanning electron microscopy (FESEM) at an acceleration voltage of 10 kV.  
34 The atomic-scale structures of as-prepared samples were analyzed on a double spherical aberration corrected  
35 transmission electron microscopy (JEOL 3100R05) with a 300 kV accelerating voltage which generated the  
36 high-resolution transmission electron microscopy (HRTEM) and high-angle annular dark field scanning  
37 transmission electron microscopy (HAADF-STEM) images. PL measurements were taken with a HORIBA  
38 iHR550 spectrometer and an excimer excitation source of 193 nm at a repetition rate of 200Hz.

39 **Photocatalytic methane oxidation.** Photocatalytic methane oxidation was performed in 390 mL Pyrex  
40 chamber under a 300 Xe lamp (**Figure S1**). The as-prepared 0.8 cm × 0.8 cm photocatalyst wafer was put on  
41 the bottom of reaction chamber. The intensity of concentrated light on the photocatalyst wafer was measured  
42 to be 5,000 mW cm<sup>-2</sup> by a thermopile detector (919P, Newport Corporation). 5 mL deionized water was added  
43 onto the bottom of chamber. Then feed gas consisting of methane and oxygen with different ratios was  
44 introduced to the chamber at atmosphere pressure. The surface temperature of sample was measured by one  
45 OMEGA RDXL4SD thermometer equipped with a thermocouple. During reaction, the surface temperature of  
46 photocatalyst wafer was determined to be ~170 °C. The gas and liquid products in chamber was manually  
47 sampled each 4 hours by using a syringe and analyzed in a gas chromatograph (Shimadzu GC-8A) equipped  
48 with two flame ionization detectors. It should be noted that one flame ionization detector was equipped with  
49 a methanizer for identifying and quantifying the carbon-based products, including ethane, CO, methanol and  
50 CO<sub>2</sub>. The TOF for methanol was calculated by the following formula:

51 
$$\text{TOF} = \text{Methanol production amount (mmol)} \div \text{photocatalyst amount (mmol)} \div \text{Time (hour)}$$

52 The mass density of Ga(In)N was 6.15 g cm<sup>-3</sup>. The amount of photocatalyst on 0.64 cm<sup>2</sup> silicon wafer used in  
53 the photocatalytic methane reforming was calculated to be 5.64 μmol (or 0.47 mg).

54 ***In-situ* DRIFTS.** The *In-situ* DRIFTS of photocatalytic methane oxidation on the as-prepared samples was  
55 performed on an INVENIO-R Fourier transform infrared spectrometer equipped with a mercury cadmium

56 telluride (MCT) detector. The DRIFTS system consisted of a praying mantis diffuse reflectance accessory and  
57 a reaction cell equipped with a heater (Harrick Scientific). Photocatalyst wafer was put in a sample cup inside  
58 the reaction cell. A cover dome contained three windows: one made of quartz permitted the transmission of  
59 UV-light beam during *in situ* reactions and two (ZnSe) for the entry and exit of detection infrared beam. Before  
60 IR measurement, the samples were firstly pretreated at 300 °C for 30 min under Ar flow (20 sccm) to clear  
61 catalyst surface. After that, the samples were cooled down to 170 °C which was the same as the test  
62 temperature under 300 W Xe lamp. Then the sample was flushed by the methane and oxygen mixture with a  
63 certain ratio at the total flow rate of 15 sccm. Meanwhile, the water vapor was introduced into the reaction  
64 cell by treating the methane and oxygen mixture through a gas scrubber containing deionized water. A 365  
65 nm LED lamp with a light intensity of 200 mW cm<sup>-2</sup> was used as the light source to photoexcite the sample.  
66 During photocatalytic methane oxidation, the corresponding IR spectra were collected and converted to  
67 Kubelka-Munk unit using Omnic™ software.

68 **Theoretical Simulation.** The mechanism of photocatalytic methane oxidation on as-prepared samples was  
69 studied by the Vienna Ab-initio Simulation Package (VASP). The revised Perdew-Burke-Ernzerh functional  
70 of (RPBE) of the generalized gradient approximation (GGA) was used in the calculation of free energy. The  
71 interaction between valence electrons and ionic core was described by the PAW pseudo-potential. The InGaN  
72 surface was simulated by its typical stable (110) facet which consists of the 3 × 3 supercell with four In/Ga-N  
73 layers. It should be noted that the ratio of In and Ga was 1:3 in slab layer according to the experimental PL  
74 result. The Ag nanoparticle on InGaN surface was simulated by one Ag cluster (31 atoms) with the diameter  
75 of ~1 nm. The convergence threshold of  $1.0 \times 10^{-4}$  eV Å<sup>-1</sup> and the cutoff of 400 eV were used in the geometry  
76 optimization at Gamma point. After geometry optimization, the projected density of states (PDOS) and charge  
77 density difference mappings were calculated with Monkhorst-Pack k-point mesh of 2 × 2 × 1, the cutoff of  
78 400 eV and energy convergence threshold of  $1.0 \times 10^{-5}$  eV.

79

80

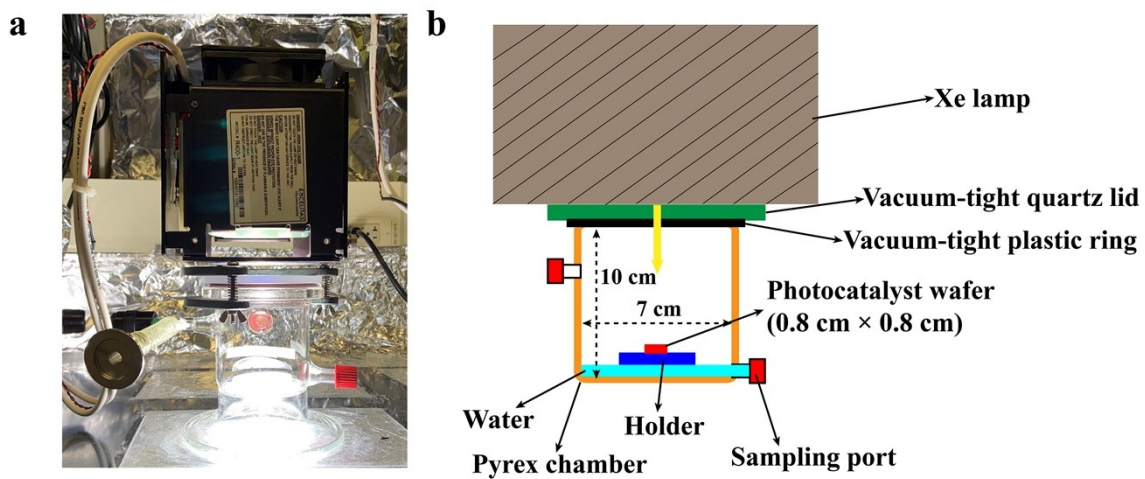

82

83 **Fig. S1** Reaction system for photocatalytic methane oxidation. (a) Image and (b) schematic illustration of  
84 reaction system.

85

86

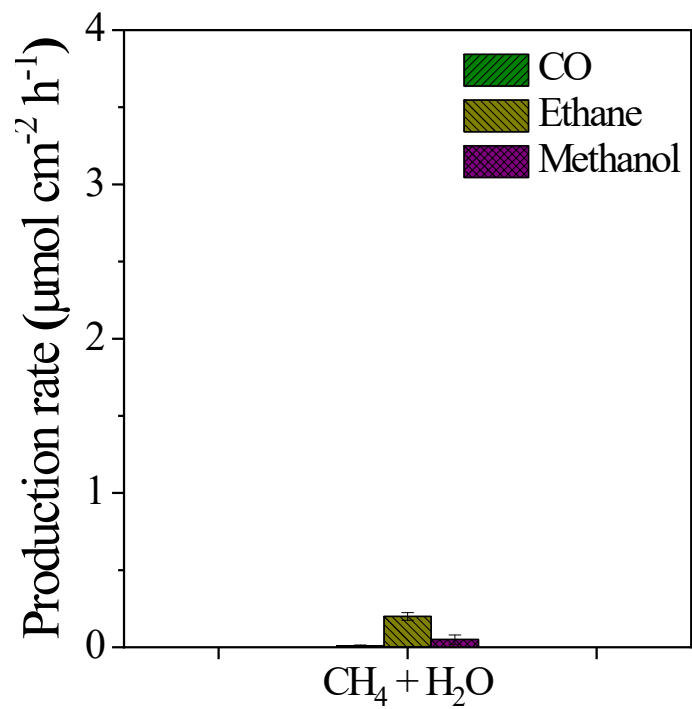

87

88 **Fig. S2** Photocatalytic methanol production on AgNP-InGaN nanowires without oxygen.

89

90

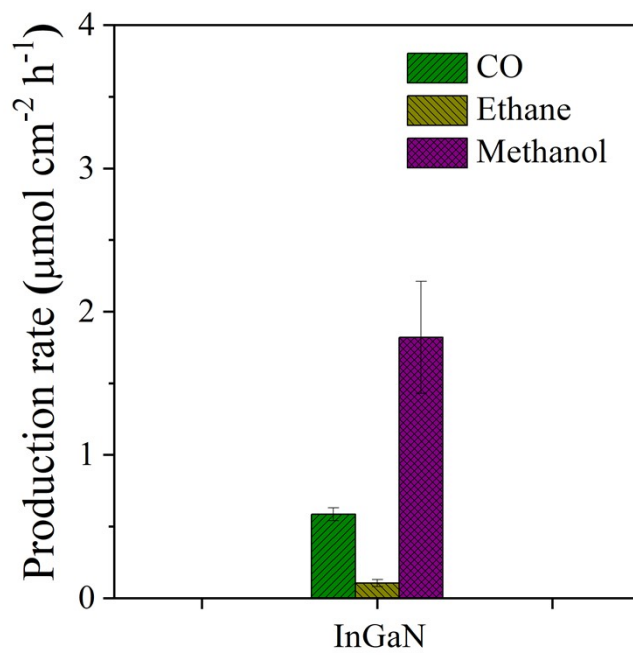

91

92 **Fig. S3** Photocatalytic methanol production on pristine InGaN nanowires.

93

94

95

96  
97  
98  
99

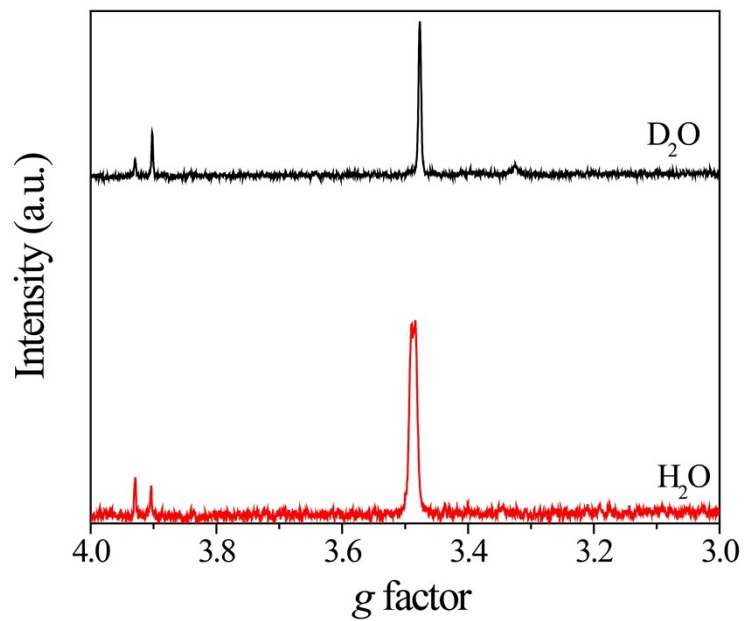

100  
101 **Fig. S4** NMR spectra of methanol produced on AgNP-InGaN nanowires with H<sub>2</sub>O or D<sub>2</sub>O.  
102

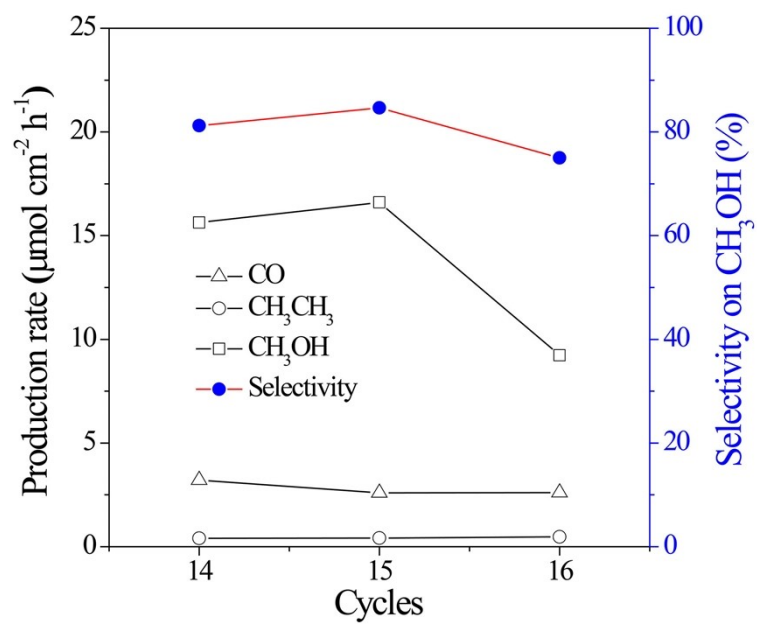

104

105 **Fig. S5** Activity of Ag/InGaN after 13 cycles.

106



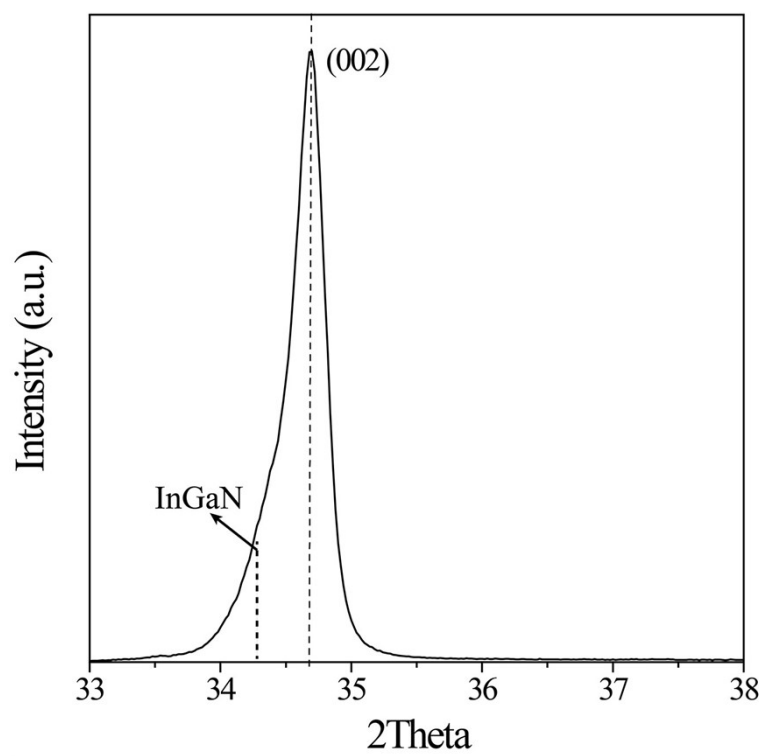

108

109 **Fig. S6** XRD pattern of Ag/InGaN nanowires after 16 cycles.

110

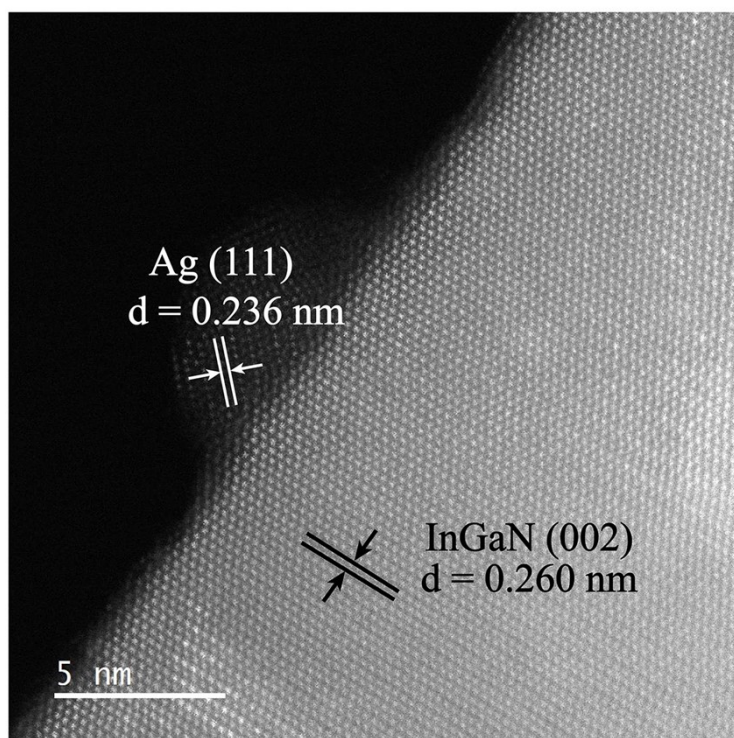

112

113 **Fig. S7** HAADF-STEM of Ag/InGaN nanowires after 16 cycles.

114

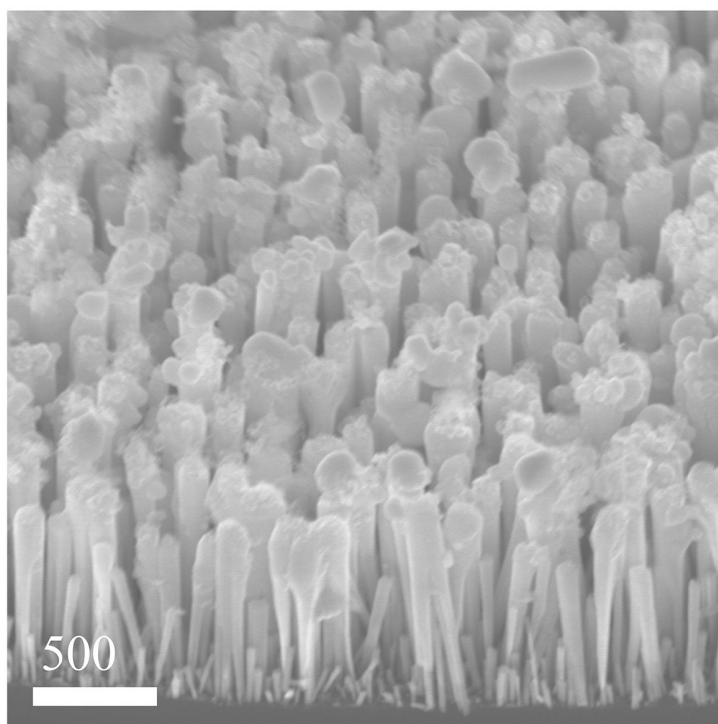

116

117 **Fig. S8** FESEM images of Ag/InGaN nanowires after 16 cycles.

118

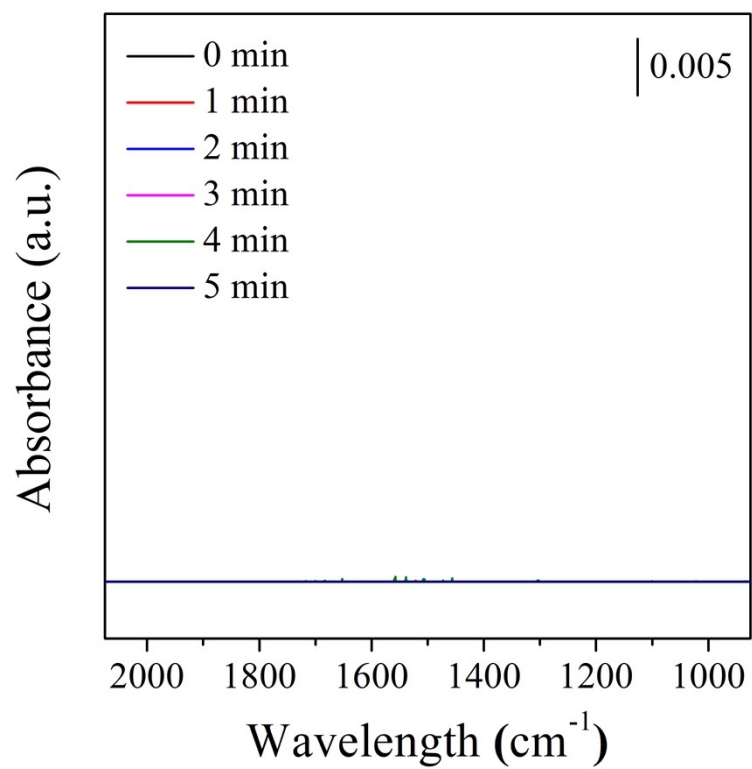

120

121 **Fig. S9** IR spectrum of Ag/InGaN in the presence of CH<sub>4</sub>, O<sub>2</sub> and H<sub>2</sub>O under dark.

122

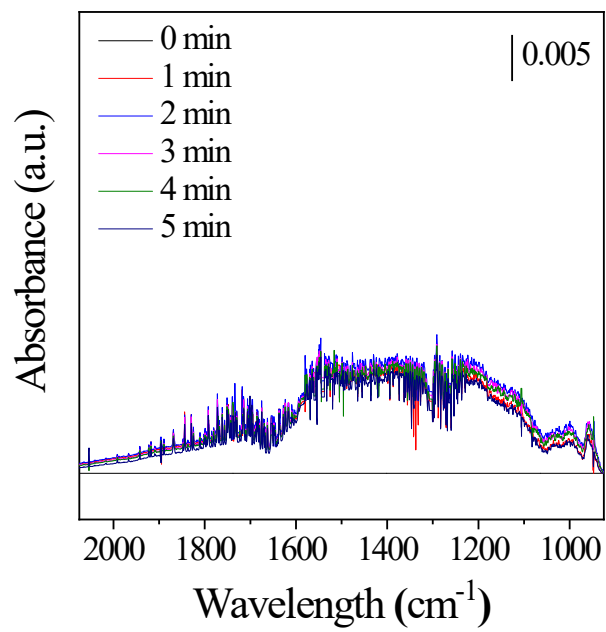

124

125 **Fig. S10** IR spectrum of pristine InGaN in the presence of CH<sub>4</sub>, O<sub>2</sub> and H<sub>2</sub>O under irradiation.

126

127

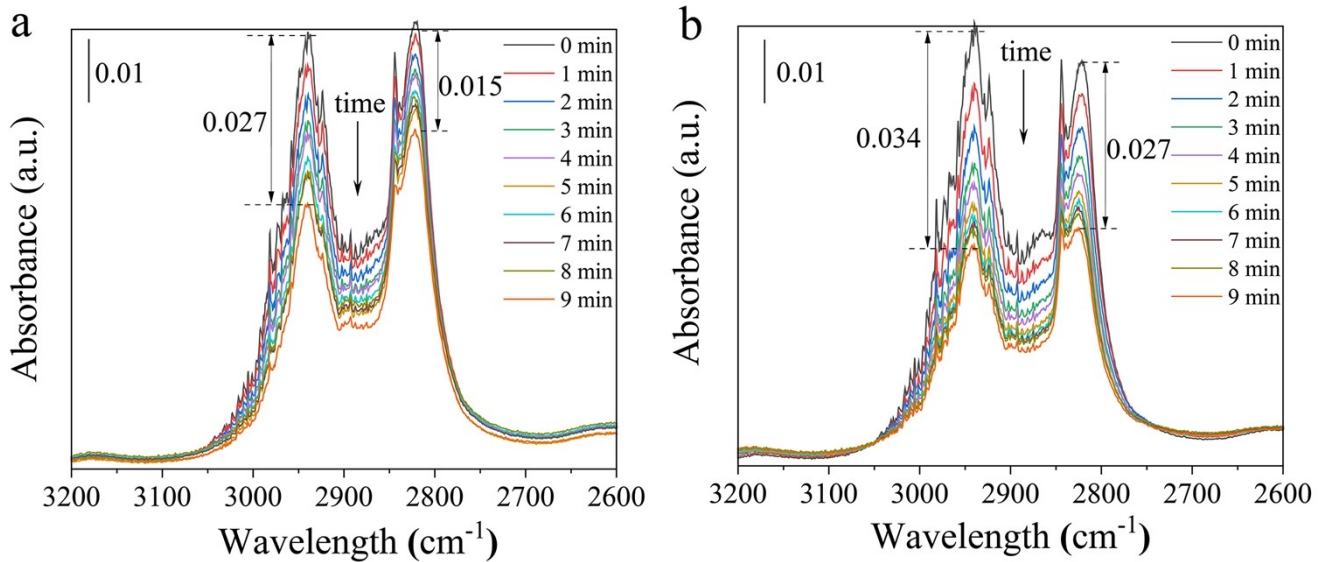

130

131

132 **Fig. S11** IR spectrum of methanol desorption on Ag/InGaN (a) without and (b) with water. Ag/InGaN was  
133 firstly pretreated before methanol adsorption and desorption measurement. The pretreatment method was same  
134 to the above in-situ IR measurement. After pretreatment, the methanol was introduced onto the surface of  
135 Ag/InGaN by an Ar carrier at a flow rate of 15 sccm through a gas scrubber containing methanol. After  
136 adsorption equilibrium, the purge gas consisting of pure Ar was used to desorb methanol from Ag/InGaN.  
137 During desorption process, the corresponding IR spectra were collected. For the water-promoted methanol  
138 desorption, the purge gas consisting of Ar and water vapor was used. The IR peaks at 2940  $\text{cm}^{-1}$  and 2825  
139  $\text{cm}^{-1}$  are assigned to the O-H and C-H bonds, respectively.

140

| Photocatalysts                          | Cocatalysts                    | Rate (mmol g <sup>-1</sup> h <sup>-1</sup> ) | Stability (hours) | Year [Ref.]          |
|-----------------------------------------|--------------------------------|----------------------------------------------|-------------------|----------------------|
| <i>p</i> -InGaN                         | Ag                             | 45.5                                         | 52                | This work            |
| ZnO                                     | Pd                             | 6.1                                          | 10                | 2019 <sup>[3]</sup>  |
| TiO <sub>2</sub>                        | FeO <sub>x</sub>               | 0.35                                         | 11                | 2018 <sup>[4]</sup>  |
| TiO <sub>2</sub>                        | Ag                             | 4.8                                          | 8                 | 2021 <sup>[5]</sup>  |
| <i>g</i> -C <sub>3</sub> N <sub>4</sub> | Cu                             | 0.11                                         | 2                 | 2019 <sup>[6]</sup>  |
| ZnO                                     | Co <sub>3</sub> O <sub>4</sub> | 0.36                                         | 5                 | 2022 <sup>[7]</sup>  |
| ZnO/Fe <sub>2</sub> O <sub>3</sub>      |                                | 0.18                                         | 30                | 2022 <sup>[8]</sup>  |
| In <sub>2</sub> O <sub>3</sub>          | Pd atom                        | 0.10                                         | 15                | 2022 <sup>[9]</sup>  |
| PMOF                                    | RuFe(OH)                       | 8.81                                         | 120               | 2022 <sup>[10]</sup> |
| bismuth vanadate                        |                                | 6.8                                          | 7                 | 2021 <sup>[11]</sup> |
| UiO-66(2.5TFA)-Fe                       |                                | 0.26                                         | 1                 | 2021 <sup>[12]</sup> |

- 145 1. M. G. Kibria, H. P. T. Nguyen, K. Cui, S. Zhao, D. Liu, H. Guo, M. L. Trudeau, S. Paradis, A.-R. Hakima and Z. Mi, *Acs*
- 146 *Nano*, 2013, **7**, 7886-7893.
- 147 2. M. G. Kibria and Z. Mi, *J. Mater. Chem. A*, 2016, **4**, 2801-2820.
- 148 3. H. Song, X. Meng, S. Wang, W. Zhou, X. Wang, T. Kako and J. Ye, *J. Am. Chem. Soc.*, 2019, **141**, 20507-20515.
- 149 4. J. J. Xie, R. X. Jin, A. Li, Y. P. Bi, Q. S. Ruan, Y. C. Deng, Y. J. Zhang, S. Y. Yao, G. Sankar, D. Ma and J. W. Tang, *Nat.*
- 150 *Catal.*, 2018, **1**, 889-896.
- 151 5. N. Feng, H. Lin, H. Song, L. Yang, D. Tang, F. Deng and J. Ye, *Nat. Commun.*, 2021, **12**, 4652.
- 152 6. Y. Y. Zhou, L. Zhang and W. Z. Wang, *Nat. Commun.*, 2019, **10**.
- 153 7. Z. Xiao, J. Shen, J. Zhang, D. Li, Y. Li, X. Wang and Z. Zhang, *J. Catal.*, 2022, **413**, 20-30.
- 154 8. K. Zheng, Y. Wu, J. Zhu, M. Wu, X. Jiao, L. Li, S. Wang, M. Fan, J. Hu, W. Yan, J. Zhu, Y. Sun and Y. Xie, *J. Am. Chem.*
- 155 *Soc.*, 2022, **144**, 12357-12366.
- 156 9. L. Luo, L. Fu, H. Liu, Y. Xu, J. Xing, C.-R. Chang, D.-Y. Yang and J. Tang, *Nat. Commun.*, 2022, **13**, 2930.
- 157 10. B. An, Z. Li, Z. Wang, X. Zeng, X. Han, Y. Cheng, A. M. Sheveleva, Z. Zhang, F. Tuna, E. J. L. McInnes, M. D. Frogley,
- 158 A. J. Ramirez-Cuesta, L. S. Natrajan, C. Wang, W. Lin, S. Yang and M. Schröder, *Nat. Mater.*, 2022, **21**, 932-938.
- 159 11. Y. Fan, W. Zhou, X. Qiu, H. Li, Y. Jiang, Z. Sun, D. Han, L. Niu and Z. Tang, *Nat. Sustain.*, 2021, **4**, 509-515.
- 160 12. W. Zhao, Y. Shi, Y. Jiang, X. Zhang, C. Long, P. An, Y. Zhu, S. Shao, Z. Yan, G. Li and Z. Tang, *Angew. Chem. Int. Ed.*,
- 161 2021, **60**, 5811-5815.
- 162
